# Supplementary material for: α-Glucosidase Inhibitory and Antimicrobial Benzoylphloroglucinols from Garcinia schomburgakiana Fruits: In Vitro and In Silico Studies
Source: MDPI journal article supplement (doi:10.3390/molecules27082574), 2022-04-15
Supplement: s1 [file s1]

## $\alpha$ -Glucosidase Inhibitory and Antimicrobial Benzoylphloroglucinols from *Garcinia schomburgakiana* Fruits: In vitro and In silico Studies

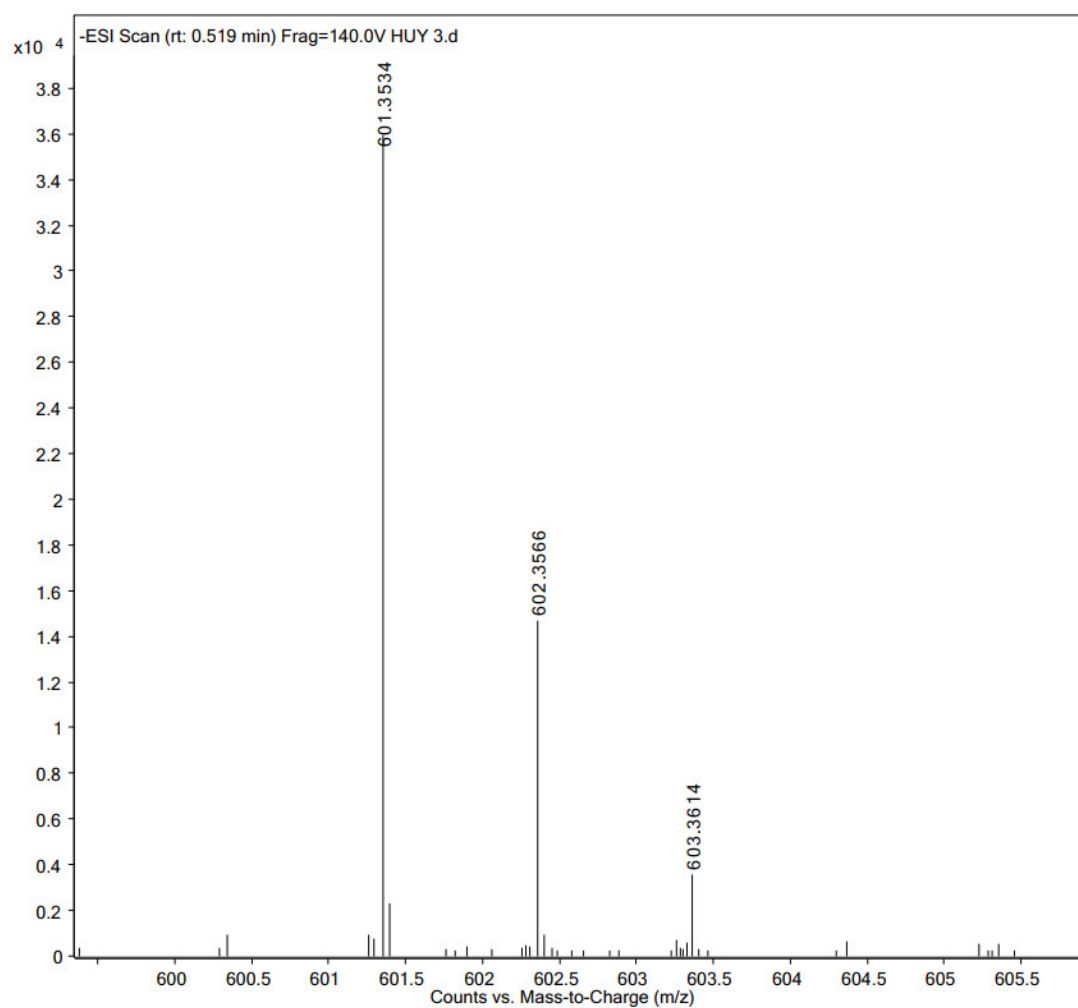

**Figure S1.** HRESIMS of **1**

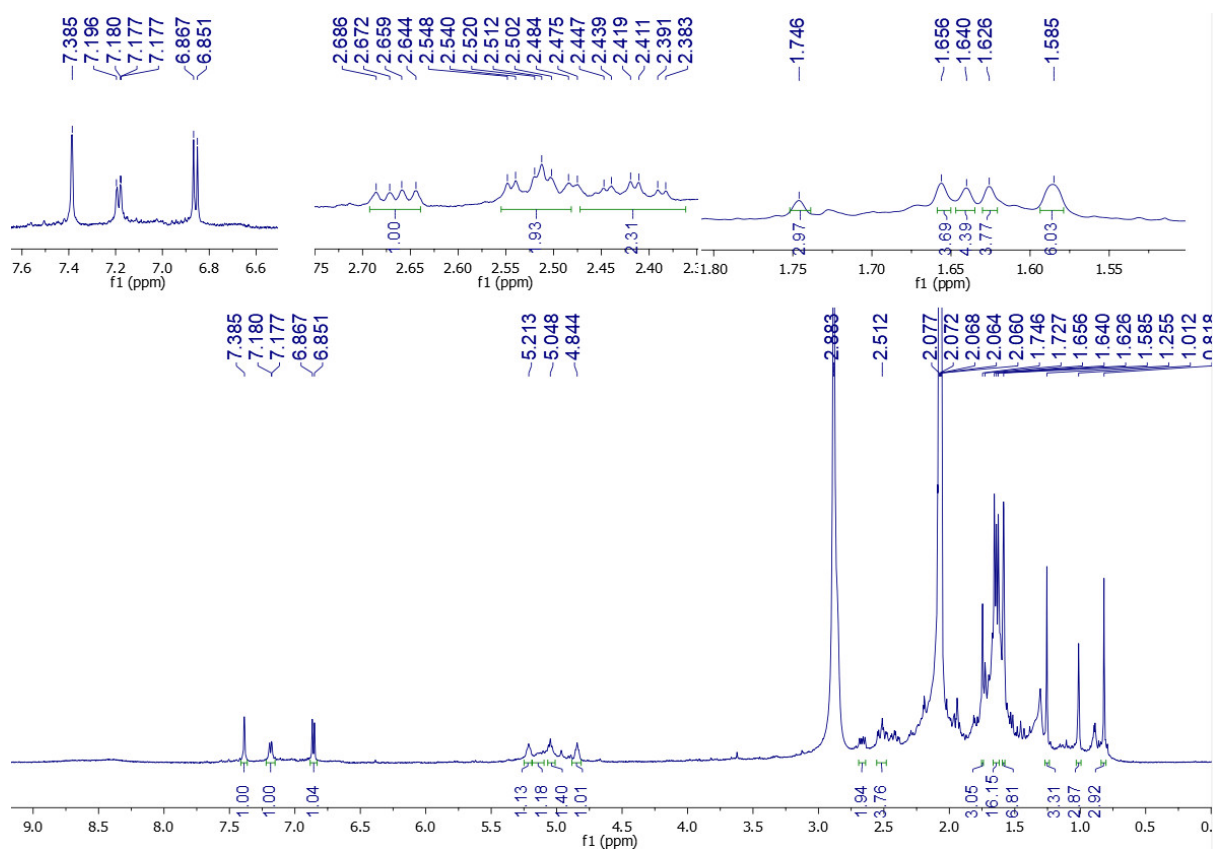

Figure S2. The <sup>1</sup>H NMR spectrum of **1** in acetone-*d*<sub>6</sub>.

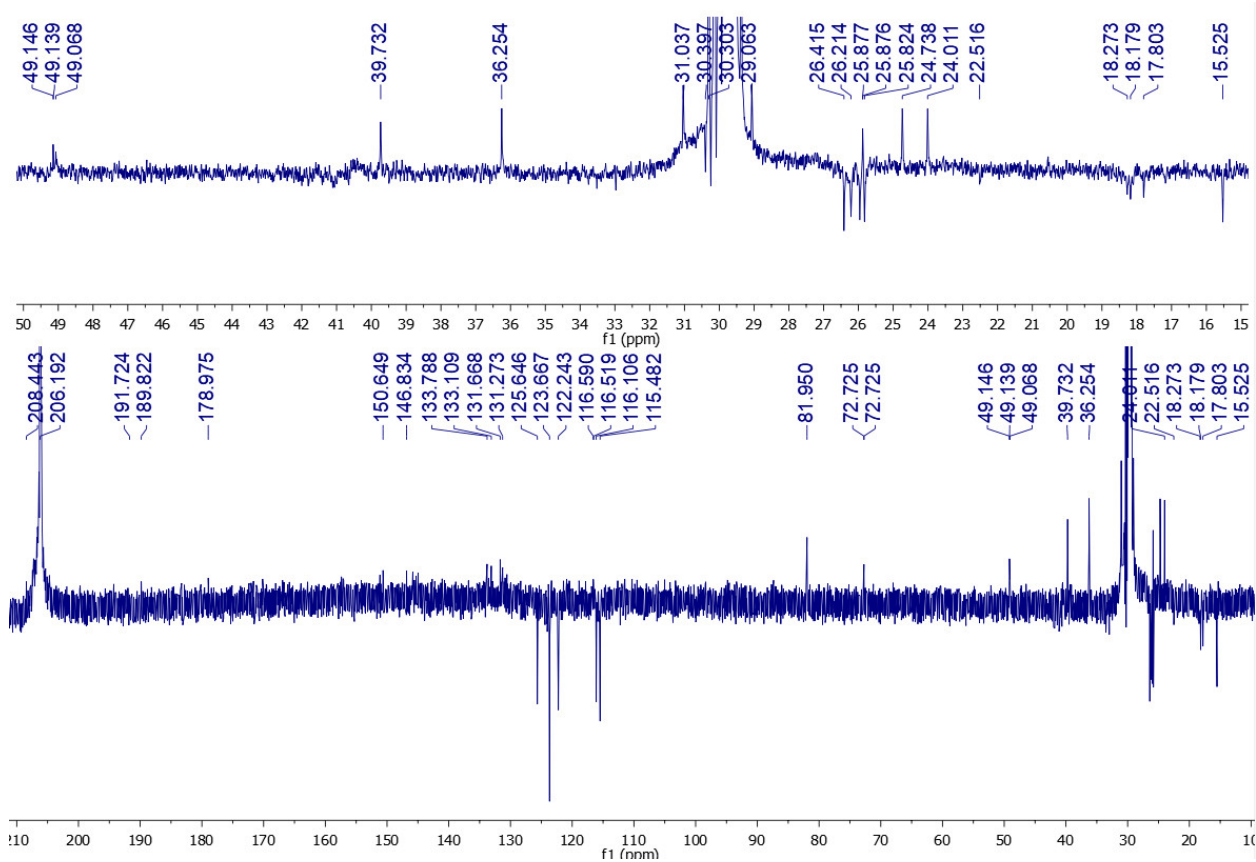

Figure S3. The <sup>13</sup>C NMR spectrum of **1** in acetone-*d*<sub>6</sub>.

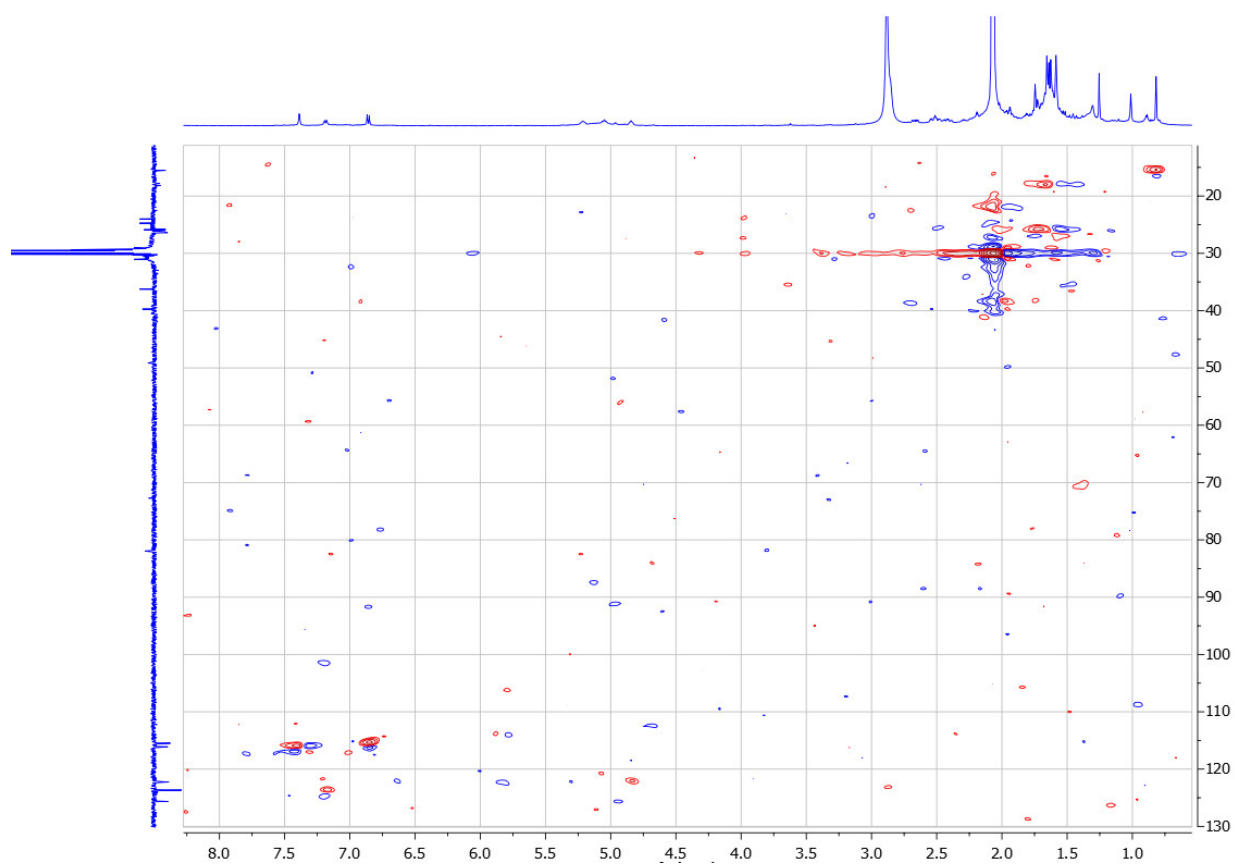

**Figure S4.** The HSQC spectrum of **1** in acetone- $d_6$ .

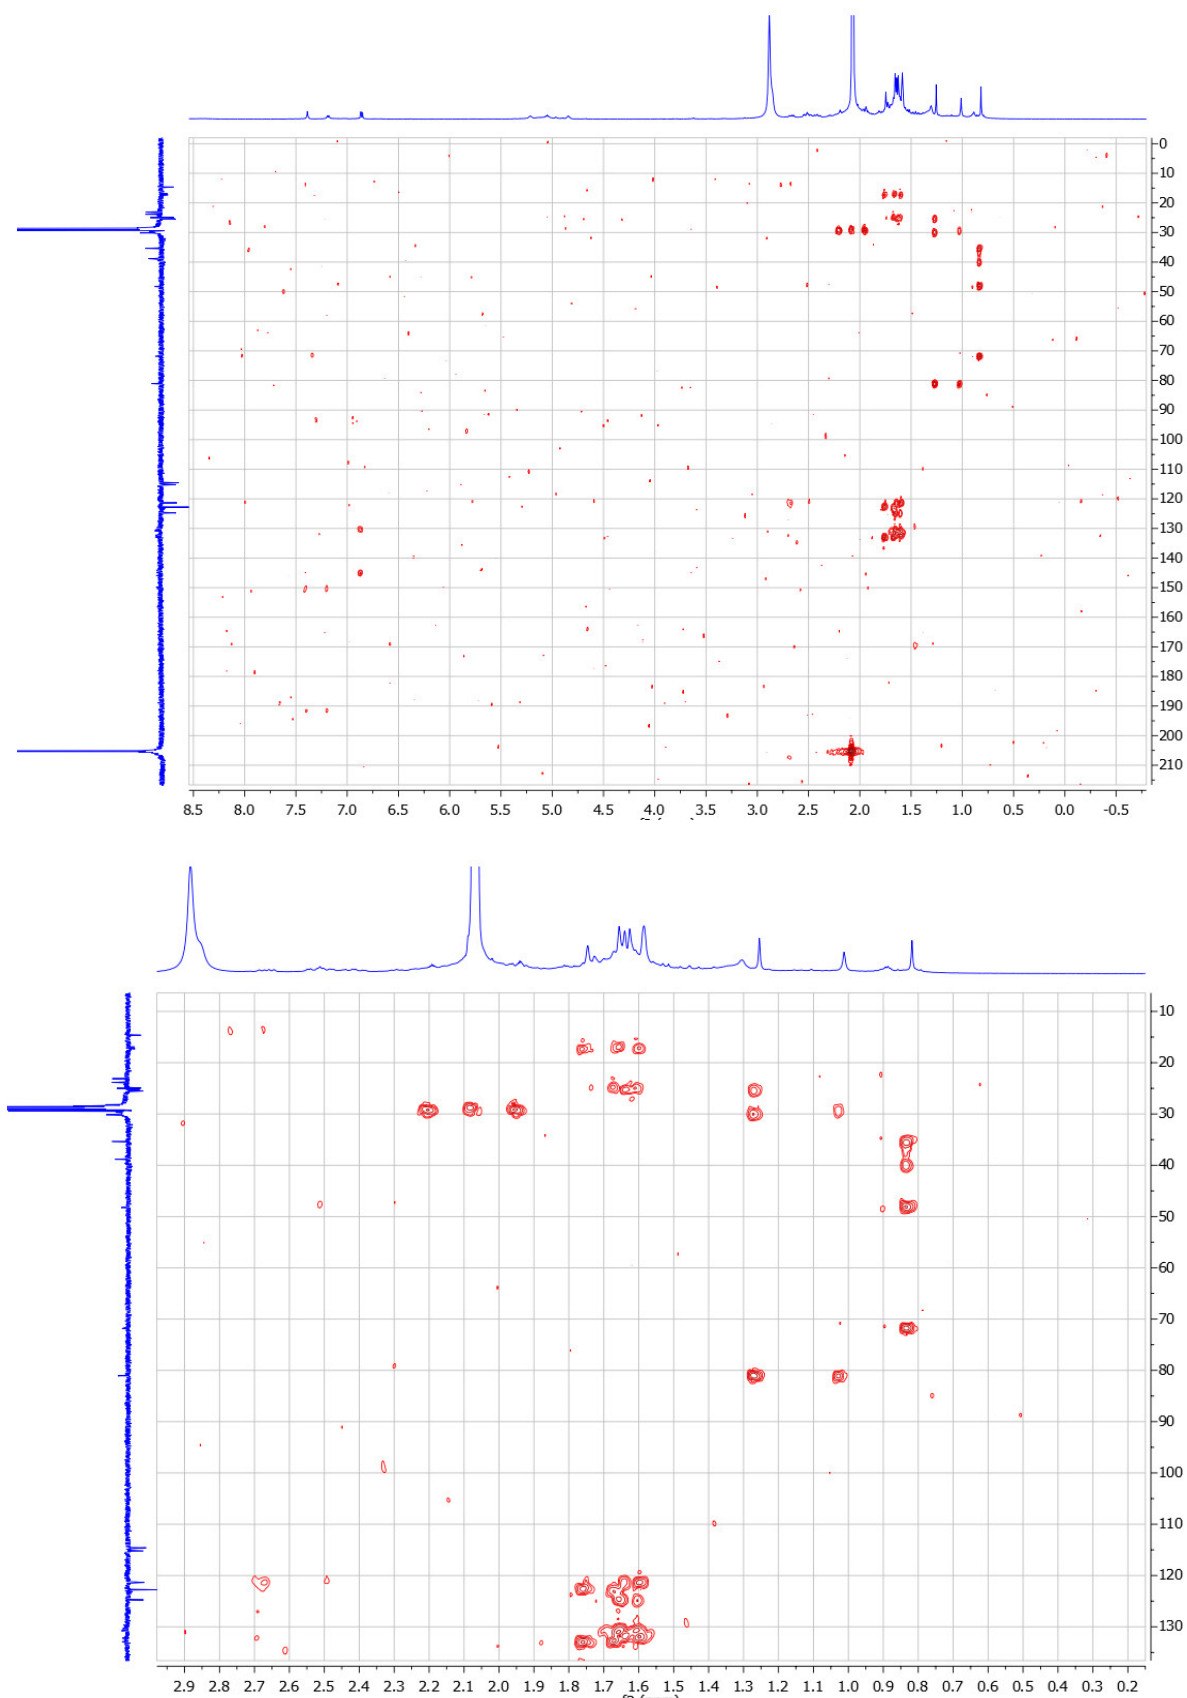

**Figure S5.** The HMBC spectrum of **1** in acetone- $d_6$ .

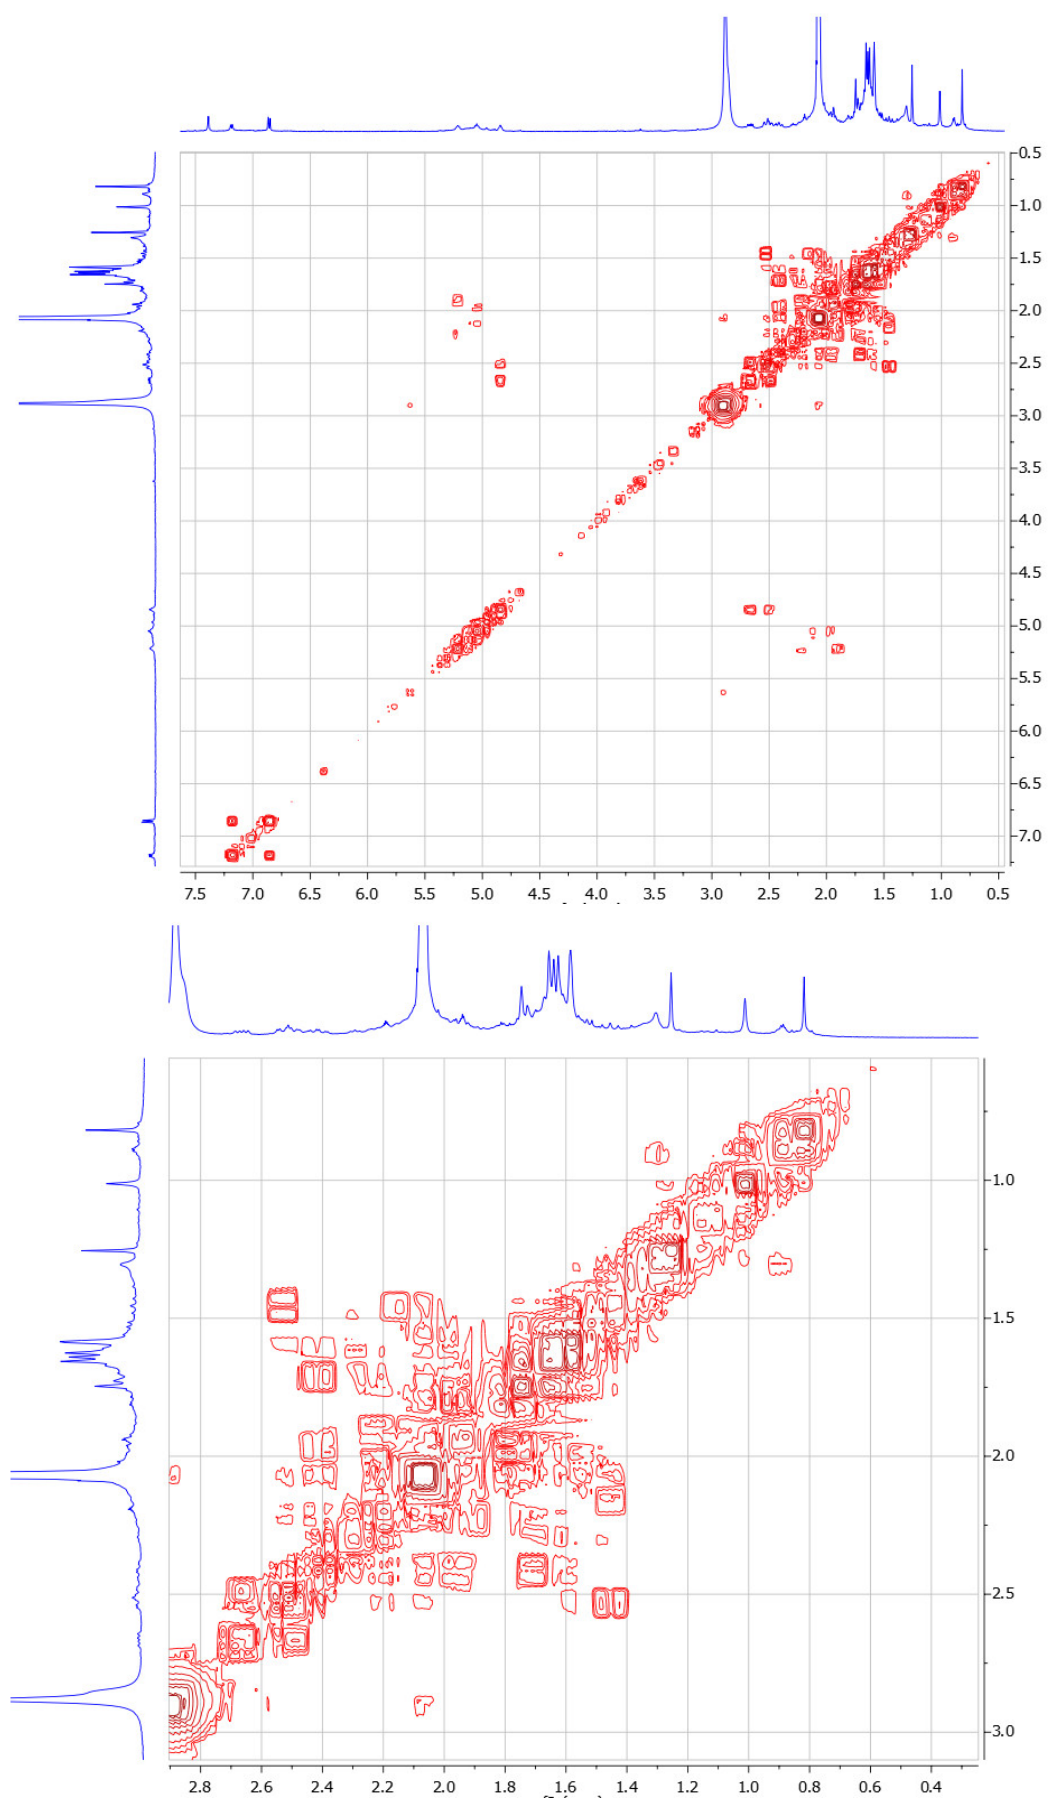

**Figure S6.** The COSY spectrum of **1** in acetone- $d_6$ .

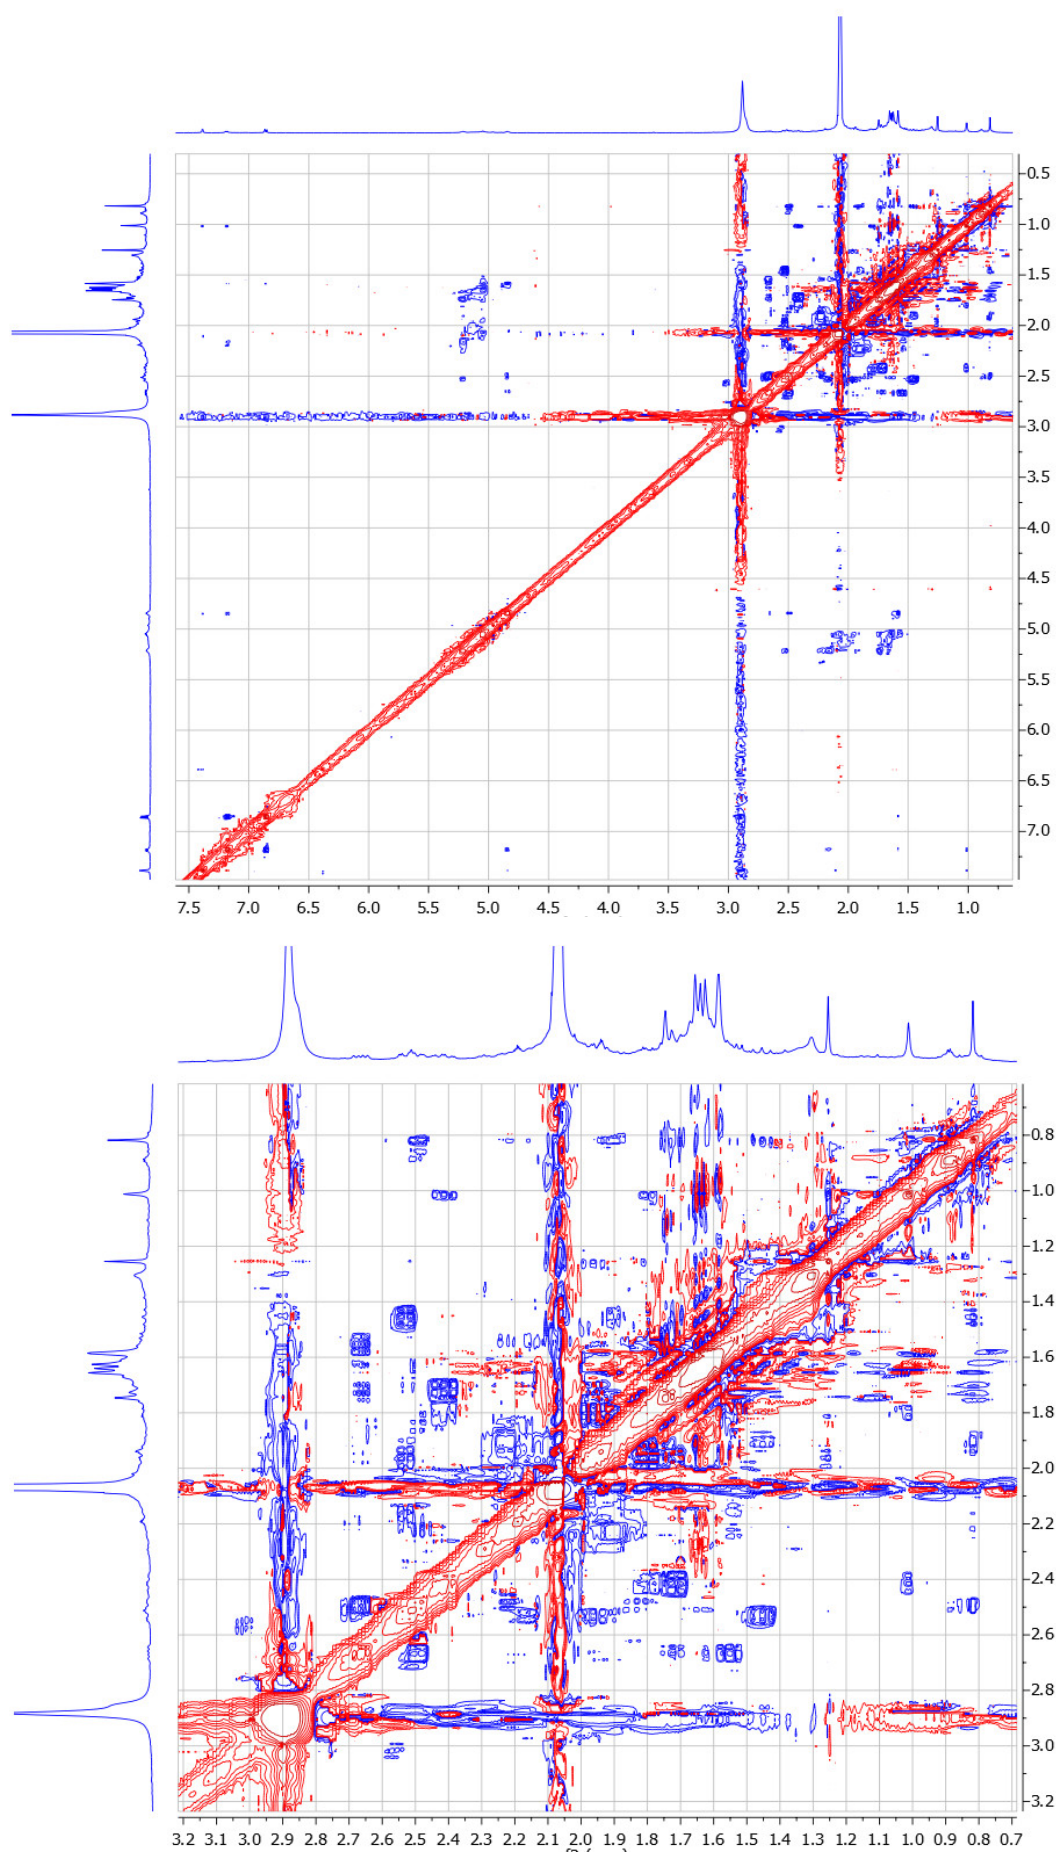

**Figure S7.** The NOESY spectrum of **1** in acetone- $d_6$ .

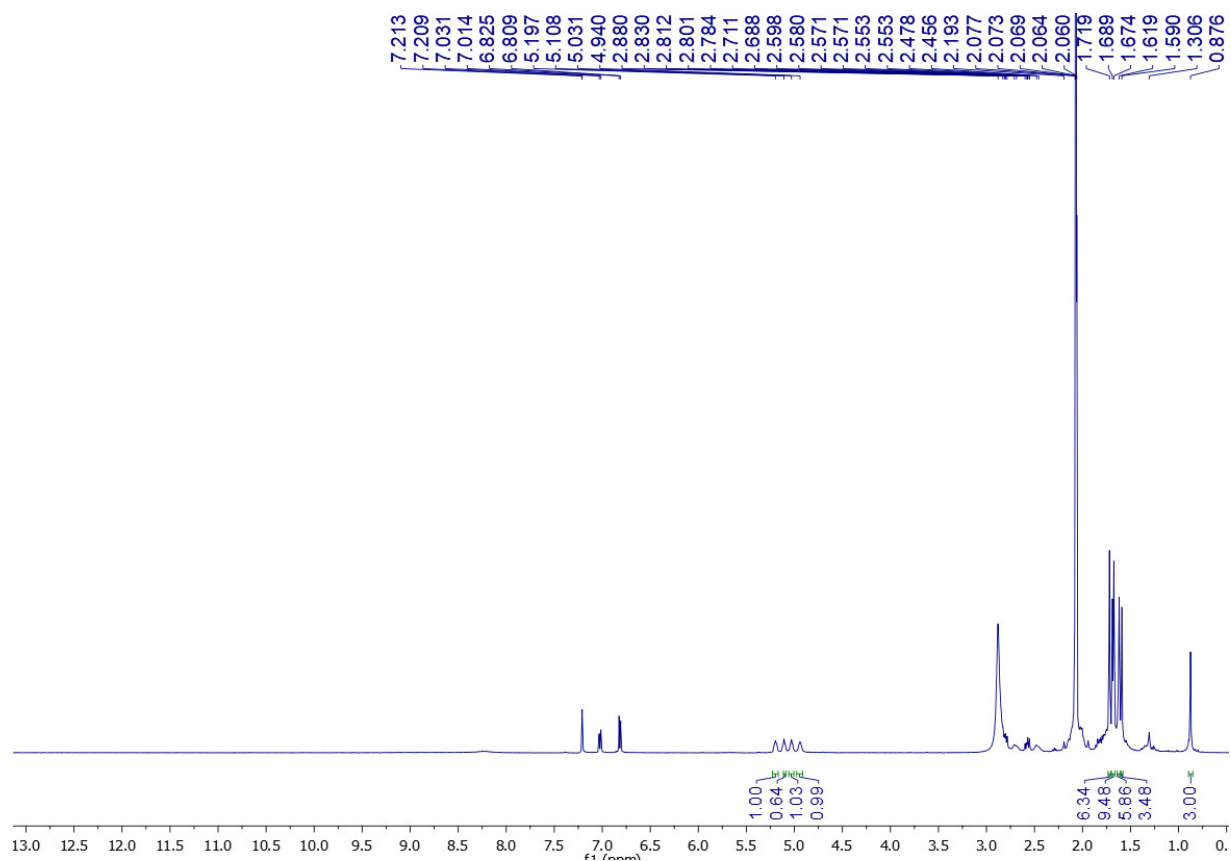

Figure S8. The <sup>1</sup>H NMR spectrum of **2** in acetone-*d*<sub>6</sub>.

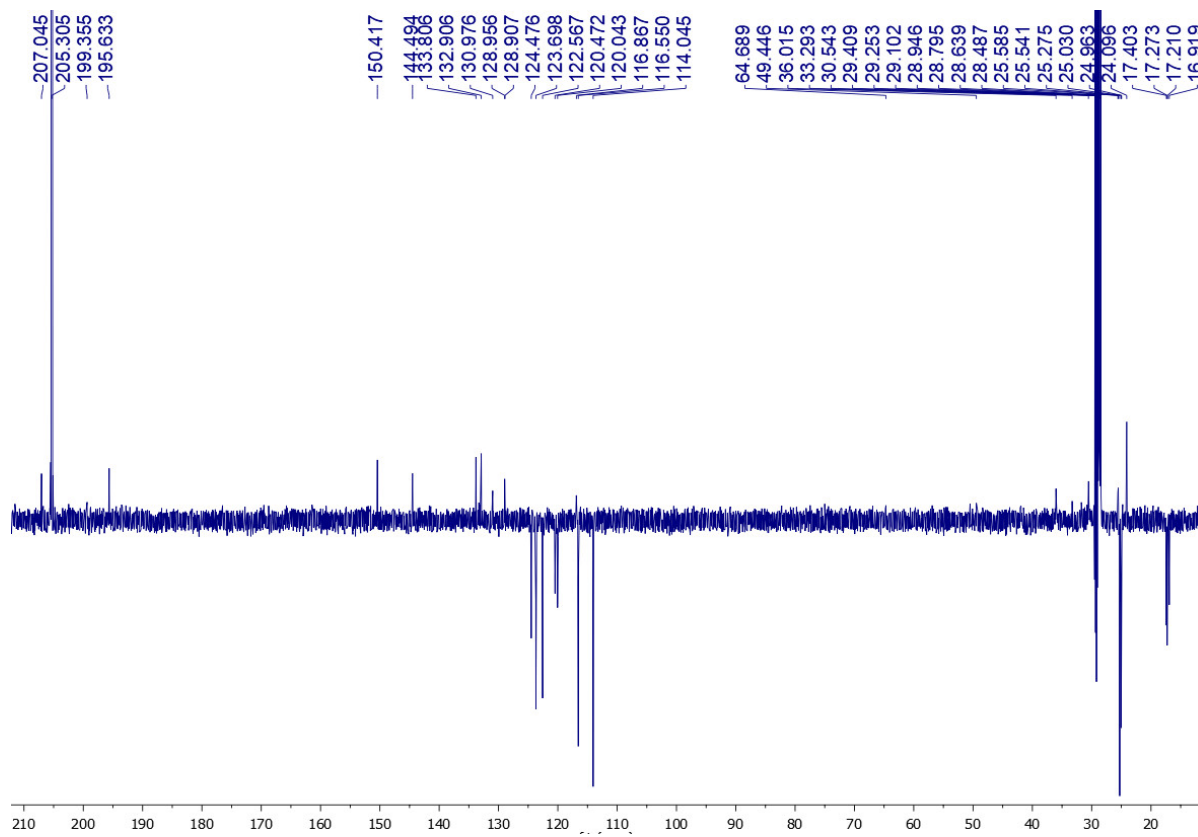

Figure S9. The <sup>13</sup>C NMR spectrum of **2** in acetone-*d*<sub>6</sub>.

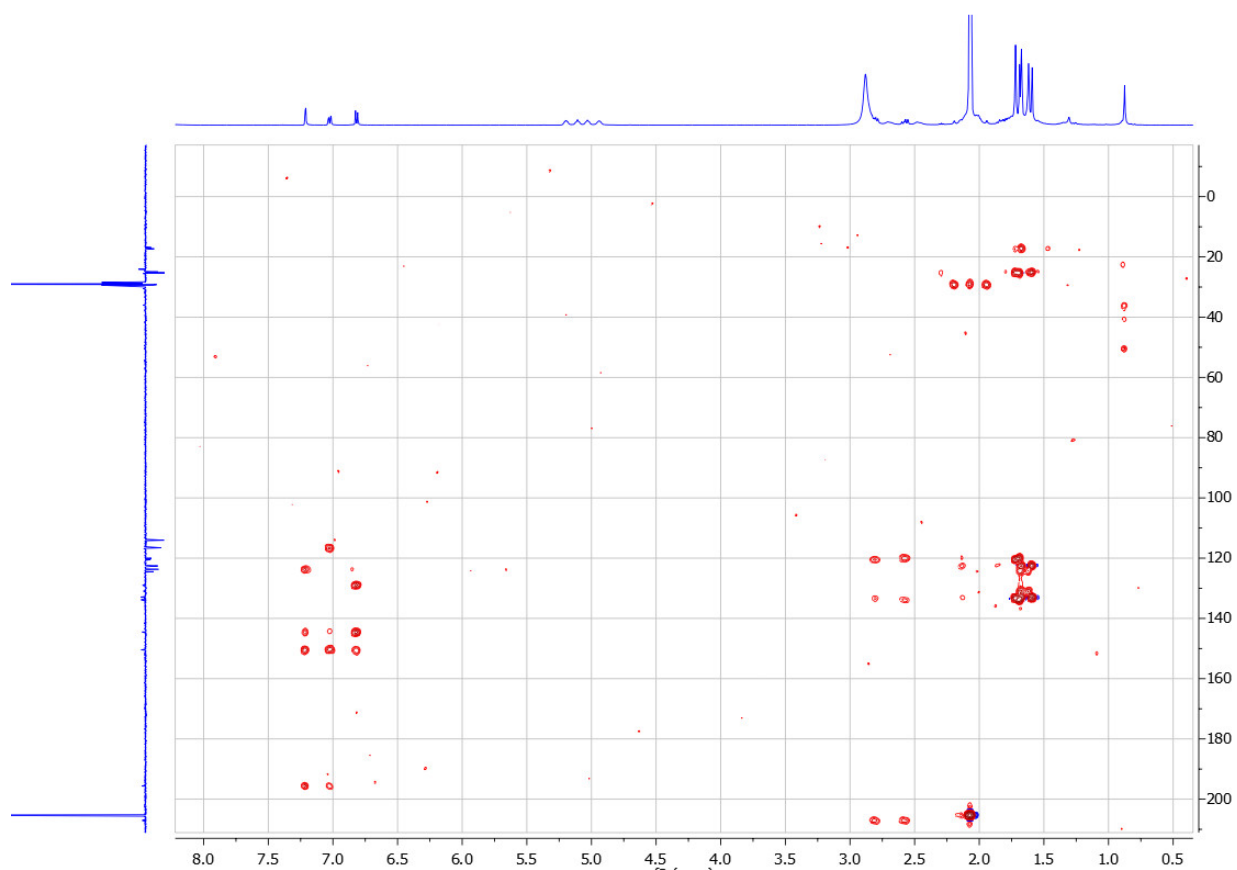

**Figure S10.** The HMBC spectrum of **2** in acetone- $d_6$ .

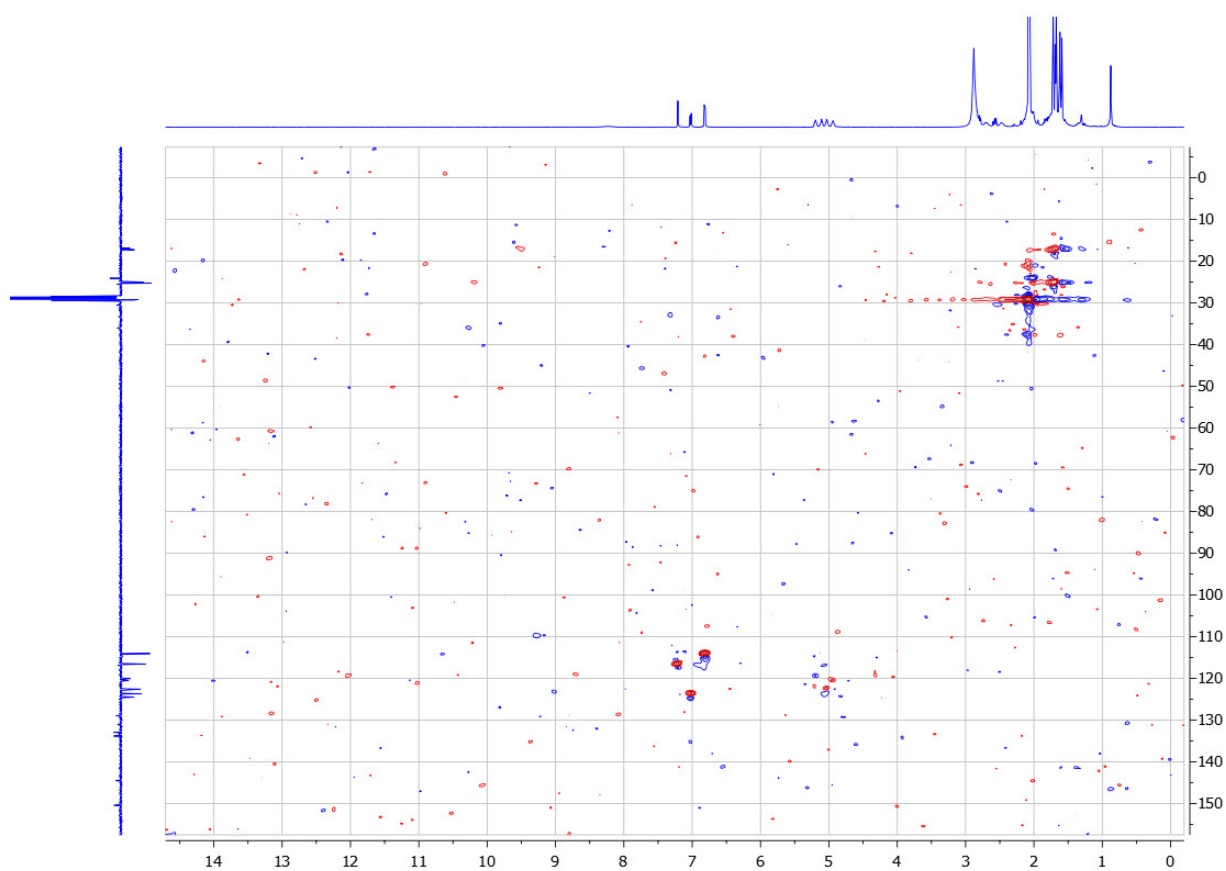

**Figure S11.** The HSQC spectrum of **2** in acetone- $d_6$ .

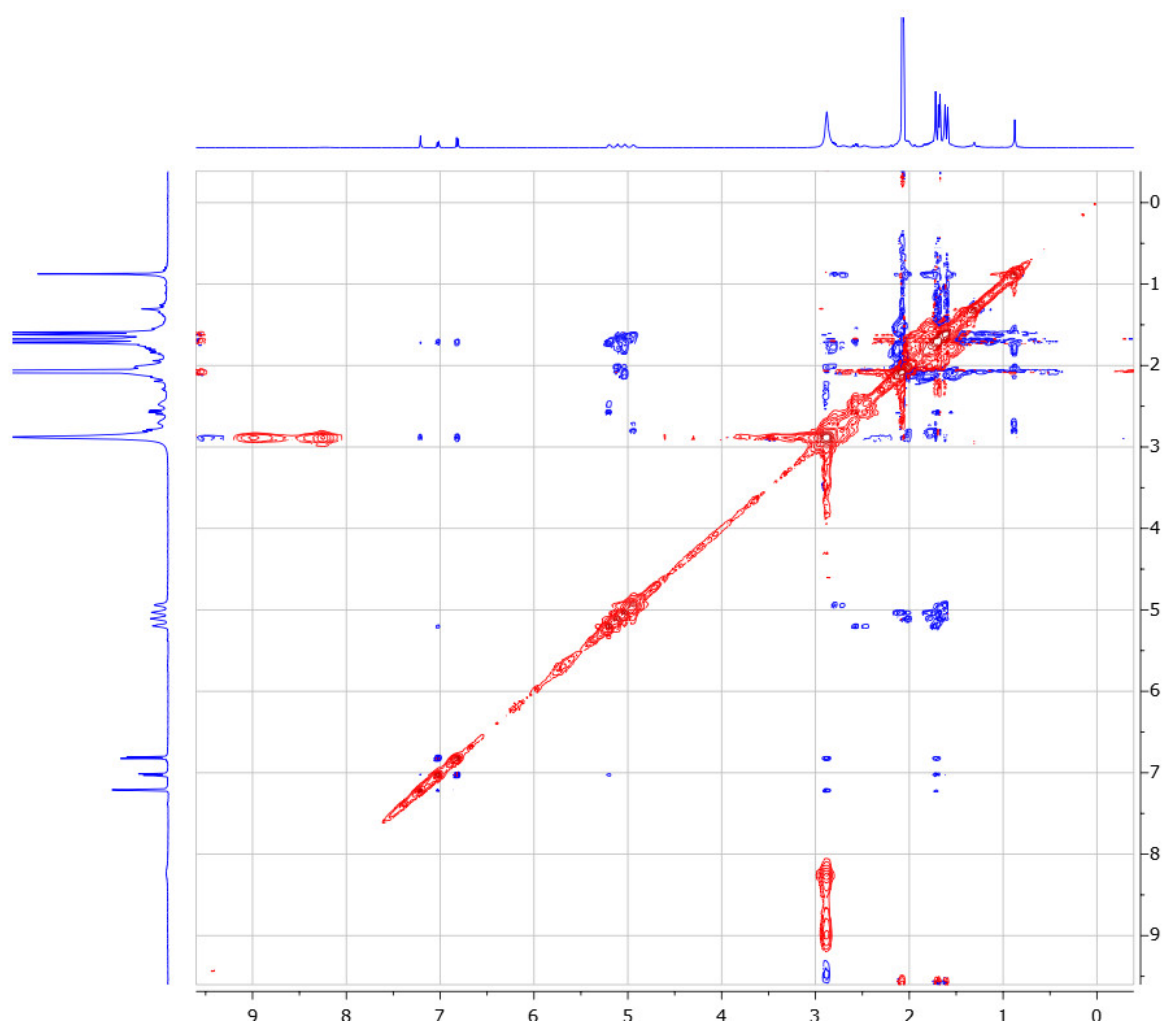

**Figure S12.** The NOESY spectrum of **2** in acetone- $d_6$ .

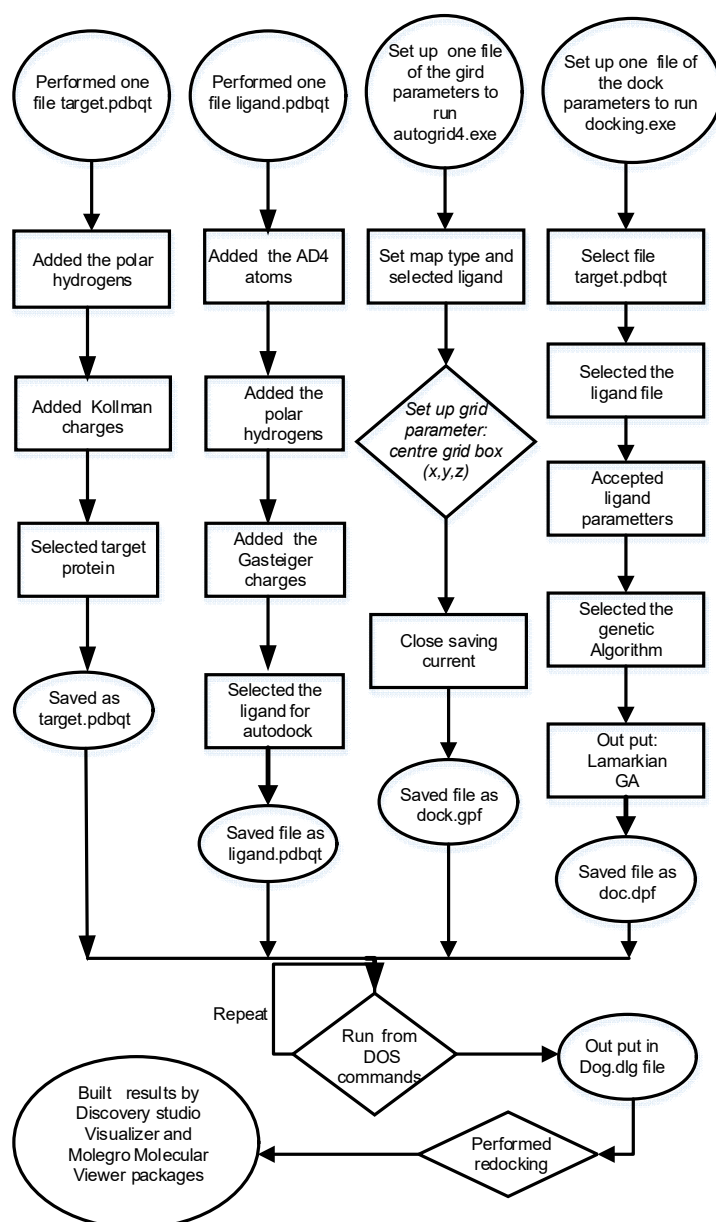

**Scheme S1.** The general Procedure docking of the most stable conformation ligand to the receptor.
